# Supplementary material for: Access Limitation to Health Services in Palestine and Its Consequences on Palestinian Mental Health and Wellbeing: Literature Review
Source: Research Square preprint supplement (doi:10.21203/rs.3.rs-167116/v1), 2021-02-04
Supplement: Supplementary file 1 [file cba3a668e3e0363d272abc94.docx]

# Appendixes

Appendix A: Search history

| Database/Search engine | Search terms/ Keywords/ combinations | Number of hits | Related articles/studies |
| --- | --- | --- | --- |
| [PubMed](https://www.ncbi.nlm.nih.gov/pubmed) | (((((((((Mental Health) AND consequences) AND limited access) OR Access) AND health care services) OR health care) AND barrier) AND Gaza strip) OR West Bank) AND Palestine | 1200 | 11 |
| Google Scholar | Mental health consequences of limited accesses to health care delivery in Palestine | About 20,300 results | 7 |
| Research Gate | Mental health consequences of limited accesses to health care delivery in Palestine |  | 5 |
| WHO Reports |  |  | 3 |
| The Palestinian ministry of health report |  |  | 2 |
